# Supplementary material
Source: Springer Nature journal article supplement (https://www.springermedizin.de/resource/supplementary/13054_2013_2873_MOESM5_ESM.pdf/9714062)

# Nosocomial Bacteremia (risk)

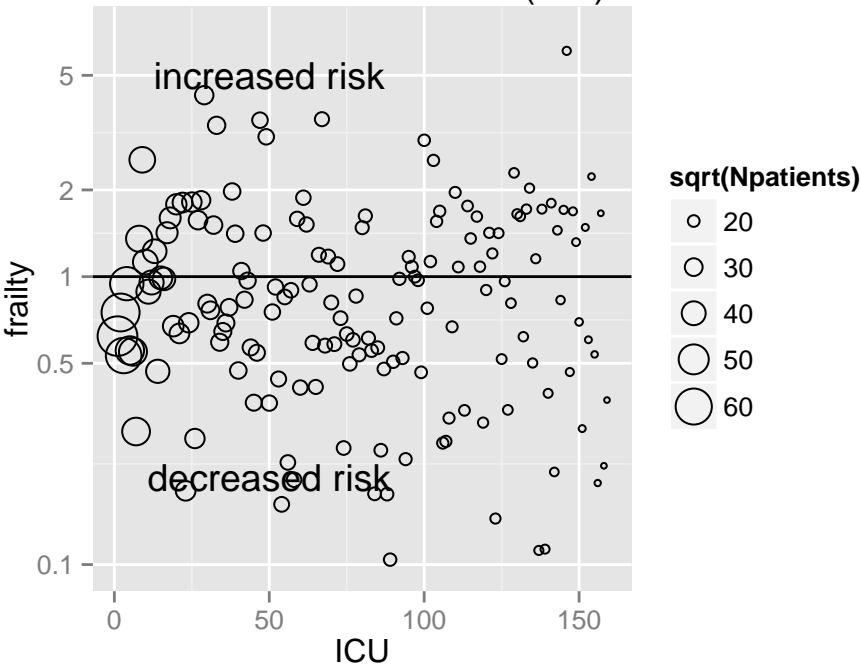

Supplement: MOESM5 [file 9714062]
